# Supplementary material for: Implementation of a virtual community of practice to promote the empowerment of middle-aged people with multimorbidity: study protocol of a randomised controlled trial
Source: PubMed Central journal article supplement — BMJ Open. 2024 May 24;14(5):e084937. doi: 10.1136/bmjopen-2024-084937 (PMC11129026; doi:10.1136/bmjopen-2024-084937), 2024-05-24
Supplement: bmjopen-2024-084937supp003.pdf [file bmjopen-2024-084937supp003.pdf]

## Additional file 3 - O'Halloran list

| CHAP     | ICPC-2 RUBRIC               | DESCRIPTION                              | ICPC-2 PLUS CODE | DESCRIPTION                        |
|----------|-----------------------------|------------------------------------------|------------------|------------------------------------|
| <b>A</b> | A04                         | <i>Weakness/Tiredness general</i>        | 029              | <i>Chronic fatigue syndrome</i>    |
|          |                             |                                          | 031              | <i>Myalgic encephalomyelitis</i>   |
|          |                             |                                          | 030              | <i>Post viral fatigue syndrome</i> |
|          |                             |                                          | 028              | <i>Post viral syndrome</i>         |
|          | A70                         | Tuberculosis                             |                  |                                    |
|          | A79                         | Malignancy, NOS                          |                  |                                    |
|          | A90                         | Congenital anomaly NOS/multiple          |                  |                                    |
| <b>B</b> | B72                         | Hodgkin's disease/lymphoma               |                  |                                    |
|          | B73                         | Leukaemia                                |                  |                                    |
|          | B74                         | Malignant neoplasm blood other           |                  |                                    |
|          | B75                         | <i>Benign/unspecified neoplasm blood</i> | 008              | <i>Myelodysplastic syndrome</i>    |
|          |                             |                                          | 004              | <i>Polycythaemia rubra vera</i>    |
|          | B78                         | Hereditary haemolytic anaemia            |                  |                                    |
|          | B81                         | Anaemia, Vit B12/folate deficiency       |                  |                                    |
|          | B82                         | Anaemia, other/unspecified               |                  |                                    |
| B83      | Purpura/coagulation defects |                                          |                  |                                    |
| B90      | HIV infection/AIDS          |                                          |                  |                                    |
| <b>D</b> | D72                         | <i>Viral hepatitis</i>                   | 003              | <i>Hepatitis B</i>                 |
|          |                             |                                          | 008              | <i>Hepatitis C</i>                 |
|          |                             |                                          | 009              | <i>Hepatitis D</i>                 |
|          | D74                         | Malignant neoplasm stomach               |                  |                                    |
|          | D75                         | Malignant neoplasm colon/rectum          |                  |                                    |
|          | D76                         | Malignant neoplasm pancreas              |                  |                                    |

| CHAP | ICPC-2 RUBRIC | DESCRIPTION                                | ICPC-2 PLUS CODE | DESCRIPTION                           |
|------|---------------|--------------------------------------------|------------------|---------------------------------------|
|      | D77           | Malignant neoplasm digestive other/NOS     |                  |                                       |
|      | D81           | <i>Congenital anomaly digestive system</i> | 011              | <i>Atresia;biliary</i>                |
|      |               |                                            | 005              | <i>Cleft;palate/lip</i>               |
|      |               |                                            | 007              | <i>Disease;Hirschsprungs</i>          |
|      |               |                                            | 002              | <i>Harelip</i>                        |
|      |               |                                            | 001              | <i>Megacolon;congenital</i>           |
|      | D84           | Congenital anomaly digestive system        |                  |                                       |
|      | D85           | Duodenal ulcer                             |                  |                                       |
|      | D86           | Peptic ulcer other                         |                  |                                       |
|      | D92           | Diverticular disease                       |                  |                                       |
|      | D93           | Irritable bowel syndrome                   |                  |                                       |
|      | D94           | Chronic enteritis/ulcerative colitis       |                  |                                       |
|      | D97           | Liver disease NOS                          |                  |                                       |
|      | D98           | Cholecystitis/cholelithiasis               |                  |                                       |
|      | D99           | <i>Disease digestive system, other</i>     | 029              | <i>Blind loop syndrome</i>            |
|      |               |                                            | 032              | <i>Insufficiency;pancreatic</i>       |
|      |               |                                            | 017              | <i>Insufficiency;vascul;mesentery</i> |
|      |               |                                            | 013              | <i>Gluten sensitivity</i>             |
|      |               |                                            | 015              | <i>Intolerance;fat</i>                |
|      |               |                                            | 012              | <i>Intolerance;gluten</i>             |
|      |               |                                            | 054              | <i>Intolerance;lactose</i>            |
|      |               |                                            | 028              | <i>Malabsorption syndrome</i>         |
|      |               |                                            | 043              | <i>Pancreatitis</i>                   |
|      |               |                                            | 036              | <i>Pyloric stenosis;acquired</i>      |
|      |               |                                            | 024              | <i>Sprue</i>                          |
|      |               |                                            | 055              | <i>Stenosis;anal</i>                  |

| CHAP     | ICPC-2 RUBRIC                       | DESCRIPTION                            | ICPC-2 PLUS CODE | DESCRIPTION                          |
|----------|-------------------------------------|----------------------------------------|------------------|--------------------------------------|
|          |                                     |                                        | 025              | <i>Stenosis;sigmoid colon</i>        |
|          |                                     |                                        | 016              | <i>Thrombosis;mesenteric</i>         |
| <b>F</b> | F74                                 | <i>Neoplasm of eye/adnexa</i>          | 003              | <i>Carcinoma;eye</i>                 |
|          |                                     |                                        | 002              | <i>Neoplasm malig;eye</i>            |
|          | F83                                 | Retinopathy                            |                  |                                      |
|          | F84                                 | Macular degeneration                   |                  |                                      |
|          | F92                                 | Cataract                               |                  |                                      |
|          | F93<br>F94                          | Glaucoma<br>Blindness                  |                  |                                      |
| <b>H</b> | H75                                 | <i>Neoplasm of ear</i>                 | 003              | <i>Carcinoma;ear</i>                 |
|          |                                     |                                        | 002              | <i>Neoplasm malig;ear</i>            |
|          | H82                                 | Vertiginous syndrome                   |                  |                                      |
|          | H84<br>H86                          | Presbycusis<br>Deafness                |                  |                                      |
| <b>K</b> | K71                                 | <i>Rheumatic fever/heart disease</i>   | 010              | <i>Carditis;rheumatic;chronic</i>    |
|          |                                     |                                        | 012              | <i>Myocarditis;rheumatic;chronic</i> |
|          |                                     |                                        | 015              | <i>Stenosis;arterial;rheumatic</i>   |
|          |                                     |                                        | 005              | <i>Stenosis;mitral;rheumatic</i>     |
|          | K72                                 | <i>Neoplasm, cardiovascular</i>        | 003              | <i>Carcinoma;cardiovascular</i>      |
|          |                                     |                                        | 002              | <i>Neoplasm malig;cardiovascular</i> |
|          | K73                                 | Congenital anomaly, cardiovascular     |                  |                                      |
| K74      | Ischaemic heart disease with angina |                                        |                  |                                      |
|          | K75                                 | Acute myocardial infarction            |                  |                                      |
|          | K76                                 | Ischaemic heart disease without angina |                  |                                      |
|          | K77                                 | Heart failure                          |                  |                                      |

| CHAP     | ICPC-2 RUBRIC | DESCRIPTION                                 | ICPC-2 PLUS CODE | DESCRIPTION                          |
|----------|---------------|---------------------------------------------|------------------|--------------------------------------|
|          | K78           | Atrial fibrillation/flutter                 |                  |                                      |
|          | K79           | Paroxysmal tachycardia                      |                  |                                      |
|          | K80           | Cardiac arrhythmia NOS                      |                  |                                      |
|          | K81           | Heart/arterial murmur NOS                   |                  |                                      |
|          | K82           | Pulmonary heart disease                     |                  |                                      |
|          | K83           | Heart valve disease NOS                     |                  |                                      |
|          | K84           | Heart disease, other                        |                  |                                      |
|          | K86           | Hypertension, uncomplicated                 |                  |                                      |
|          | K87           | Hypertension, complicated                   |                  |                                      |
|          | K88           | Postural hypotension                        |                  |                                      |
|          | K89           | Transient cerebral ischaemia                |                  |                                      |
|          | K90           | Stroke/cerebrovascular accident             |                  |                                      |
|          | K91           | Cerebrovascular disease                     |                  |                                      |
|          | K92           | Atherosclerosis/peripheral vascular disease |                  |                                      |
|          | K93           | Pulmonary embolism                          |                  |                                      |
|          | K94           | Phlebitis/thrombophlebitis                  |                  |                                      |
|          | K95           | Varicose veins of leg                       |                  |                                      |
| <b>L</b> | L71           | Malignant neoplasm, musculoskeletal         |                  |                                      |
|          | L82           | <i>Congenital anomaly, musculoskeletal</i>  | 001              | <i>Achondroplastic dwarf</i>         |
|          |               |                                             | 003              | <i>Clubfoot</i>                      |
|          |               |                                             | 015              | <i>Curvature of spine;congenital</i> |
|          |               |                                             | 025              | <i>Deformity;foot;congenital</i>     |
|          |               |                                             | 024              | <i>Dislocation;hip;congenital</i>    |
|          |               |                                             | 013              | <i>Ehlers Danlos syndrome</i>        |
|          |               |                                             | 021              | <i>Kyphoscoliosis;congenital</i>     |

| CHAP | ICPC-2 RUBRIC | DESCRIPTION                           | ICPC-2 PLUS CODE | DESCRIPTION                         |
|------|---------------|---------------------------------------|------------------|-------------------------------------|
|      |               |                                       | 019              | <i>Kyphosis;congenital</i>          |
|      |               |                                       | 007              | <i>Lordosis;congenital</i>          |
|      |               |                                       | 018              | <i>Osteogenesis imperfecta</i>      |
|      |               |                                       | 027              | <i>Plagiocephaly</i>                |
|      |               |                                       | 012              | <i>Scoliosis;congenital</i>         |
|      |               |                                       | 014              | <i>Talipes</i>                      |
|      | L83           | Neck syndrome                         |                  |                                     |
|      | L84           | Back syndrome without radiating pain  |                  |                                     |
|      | L85           | Acquired deformity of spine           |                  |                                     |
|      | L86           | Back syndrome with radiating pain     |                  |                                     |
|      | L88           | Rheumatoid/seropositive arthritis     |                  |                                     |
|      | L89           | Osteoarthritis of hip                 |                  |                                     |
|      | L90           | Osteoarthritis of knee                |                  |                                     |
|      | L91           | Osteoarthritis, other                 |                  |                                     |
|      | L92           | Shoulder syndrome                     |                  |                                     |
|      | L93           | Tennis elbow                          |                  |                                     |
|      | L95           | Osteoporosis                          |                  |                                     |
|      | L99           | <i>Musculoskeletal disease, other</i> | 047              | <i>Arthropathy;Behcets syndrome</i> |
|      |               |                                       | 087              | <i>Arthropathy;Reiters disease</i>  |
|      |               |                                       | 088              | <i>Chondromalacia;patella</i>       |
|      |               |                                       | 013              | <i>Disease;Pagets (bone)</i>        |
|      |               |                                       | 093              | <i>Dystrophy;muscular</i>           |
|      |               |                                       | 056              | <i>Lupus erythematosus</i>          |
|      |               |                                       | 025              | <i>Osteitis</i>                     |
|      |               |                                       | 026              | <i>Osteitis deformans</i>           |
|      |               |                                       | 060              | <i>Polymyositis</i>                 |

| CHAP     | ICPC-2 RUBRIC | DESCRIPTION                          | ICPC-2 PLUS CODE | DESCRIPTION                         |
|----------|---------------|--------------------------------------|------------------|-------------------------------------|
|          |               |                                      | 071              | <i>Progressive system sclerosis</i> |
|          |               |                                      | 075              | <i>Reiters syndrome</i>             |
|          |               |                                      | 078              | <i>Repetitive Strain Injury</i>     |
|          |               |                                      | 069              | <i>Scleroderma;diffuse</i>          |
|          |               |                                      | 070              | <i>Scleroderma;localised</i>        |
|          |               |                                      | 028              | <i>Scleroderma;progressive</i>      |
|          |               |                                      | 033              | <i>Sjorgens syndrome</i>            |
|          |               |                                      | 065              | <i>Systemic lupus erythematosus</i> |
| <b>N</b> | N73           | Neurological infection, other        |                  |                                     |
|          | N74           | Malignant neoplasm nervous system    |                  |                                     |
|          | N75           | Benign neoplasm nervous system       |                  |                                     |
|          | N76           | Neoplasm nervous system, unspecified |                  |                                     |
|          | N85           | Congenital anomaly neurological      |                  |                                     |
|          | N86           | Multiple sclerosis                   |                  |                                     |
|          | N87           | Parkinsonism                         |                  |                                     |
|          | N88           | Epilepsy                             |                  |                                     |
|          | N89           | Migraine                             |                  |                                     |
|          | N90           | Cluster headache                     |                  |                                     |
|          | N92           | Trigeminal neuralgia                 |                  |                                     |
|          | N93           | Carpal tunnel syndrome               |                  |                                     |
|          | N94           | Peripheral neuritis/neuropathy       |                  |                                     |
|          | N99           | <i>Neurological disease, other</i>   | 025              | <i>Arachnoiditis</i>                |
|          |               |                                      | 005              | <i>Atrophy;cerebral</i>             |
|          |               |                                      | 004              | <i>Chorea;Huntingtons</i>           |
|          |               |                                      | 027              | <i>Degeneration;cerebral</i>        |
|          |               |                                      | 010              | <i>Disease;motor neuron</i>         |

| CHAP     | ICPC-2 RUBRIC | DESCRIPTION                    | ICPC-2 PLUS CODE | DESCRIPTION                        |
|----------|---------------|--------------------------------|------------------|------------------------------------|
|          |               |                                | 042              | <i>Encephalopathy</i>              |
|          |               |                                | 043              | <i>Encephalopathy;Wernickes</i>    |
|          |               |                                | 011              | <i>Myasthenia Gravis</i>           |
|          |               |                                | 003              | <i>Palsy;cerebral</i>              |
|          |               |                                | 022              | <i>Palsy;infantile spastic</i>     |
|          |               |                                | 040              | <i>Palsy;spastic</i>               |
|          |               |                                | 017              | <i>Paralysis;infantile spastic</i> |
|          |               |                                | 018              | <i>Paraplegia</i>                  |
|          |               |                                | 020              | <i>Quadriplegia</i>                |
|          |               |                                | 030              | <i>Syringomyelia</i>               |
| <b>P</b> | P15           | Chronic alcohol abuse          |                  |                                    |
|          | P70           | Dementia                       |                  |                                    |
|          | P71           | Organic psychosis, other       |                  |                                    |
|          | P72           | Schizophrenia                  |                  |                                    |
|          | P73           | Affective psychosis            |                  |                                    |
|          | P74           | Anxiety disorder/anxiety state |                  |                                    |
|          | P75           | Somatisation disorder          |                  |                                    |
|          | P76           | Depressive disorder            |                  |                                    |
|          | P78           | Neuraesthesia, surmenage       |                  |                                    |
|          | P79           | Phobia/compulsive disorder     |                  |                                    |
|          | P80           | Personality disorder           |                  |                                    |
|          | P81           | Hyperkinetic disorder          |                  |                                    |
|          | P82           | Post-traumatic stress disorder |                  |                                    |
|          | P85           | Mental retardation             |                  |                                    |
|          | P86           | Anorexia nervosa/bulimia       |                  |                                    |
|          | P98           | Psychosis NOS/other            |                  |                                    |

| CHAP | ICPC-2 RUBRIC | DESCRIPTION                           | ICPC-2 PLUS CODE       | DESCRIPTION                 |
|------|---------------|---------------------------------------|------------------------|-----------------------------|
|      | P99           | Psychological disorders, other        | 005                    | Autism                      |
|      |               |                                       | 006                    | Autism;child                |
| R    | R84           | Malignant neoplasm bronchus, lung     |                        |                             |
|      | R85           | Malignant neoplasm respiratory, other |                        |                             |
|      | R90           | Hypertrophy tonsils/adenoids          |                        |                             |
|      | R95           | Chronic obstructive pulmonary disease |                        |                             |
|      | R96           | Asthma                                |                        |                             |
|      | R99           | Respiratory disease, other            | 015                    | Asbestosis                  |
|      |               |                                       | 018                    | Bronchiectasis              |
|      |               |                                       | 004                    | Failure;respiratory         |
|      |               |                                       | 009                    | Farmers lung                |
|      |               |                                       | 019                    | Fibrosing alveolitis        |
|      |               | 010                                   | Fibrosis;pulmonary     |                             |
|      |               | 012                                   | Pneumoconiosis         |                             |
|      |               | 020                                   | Pneumonia;interstitial |                             |
| S    | S77           | Malignant neoplasm of skin            |                        |                             |
|      | S86           | Dermatitis, seborrhoeic               |                        |                             |
|      | S87           | Dermatitis/atopic eczema              |                        |                             |
|      | S91           | Psoriasis                             |                        |                             |
|      | S96           | Acne                                  | 007                    | Acne                        |
|      |               |                                       | 003                    | Acne;conglobulate (cystic)  |
|      |               |                                       | 002                    | Acne;vulgaris               |
|      | S99           | Skin disease, other                   | 001                    | Acne;rosacea                |
|      |               |                                       | 003                    | Dermatitis;herpetiformis    |
|      |               |                                       | 034                    | Discoid lupus erythematosus |
|      |               | 042                                   | Lichen sclerosus       |                             |

| CHAP | ICPC-2 RUBRIC | DESCRIPTION                                           | ICPC-2 PLUS CODE          | DESCRIPTION                           |
|------|---------------|-------------------------------------------------------|---------------------------|---------------------------------------|
|      |               |                                                       | 031                       | <i>Necrobiosis lipoidica diabetic</i> |
|      |               |                                                       | 018                       | <i>Pemphigus</i>                      |
|      |               |                                                       | 021                       | <i>Rhinophyma</i>                     |
| T    | T71           | Malignant neoplasm thyroid                            |                           |                                       |
|      | T73           | <i>Neoplasm endocrine other/uncertain</i>             | 001                       | <i>Carcinoma;endocrine</i>            |
|      |               |                                                       | 002                       | <i>Neoplasm malig;endocrine</i>       |
|      | T80           | <i>Congenital anomaly endocrine/metabolic</i>         | 007                       | <i>Cretinism</i>                      |
|      |               |                                                       | 001                       | <i>Disease;Hurlers</i>                |
|      |               |                                                       | 002                       | <i>Dwarfism</i>                       |
|      |               |                                                       | 005                       | <i>Pseudohypoparathyroidism</i>       |
|      | T81           | Goitre                                                |                           |                                       |
|      | T82           | Obesity                                               |                           |                                       |
|      | T83           | Overweight                                            |                           |                                       |
|      | T85           | Hyperthyroidism/thyrotoxicosis                        |                           |                                       |
|      | T86           | Hypothyroidism/myxoedema                              |                           |                                       |
|      | T89           | Diabetes, insulin dependent                           |                           |                                       |
|      | T90           | Diabetes, non-insulin dependent                       |                           |                                       |
|      | T92           | Gout                                                  |                           |                                       |
|      | T93           | Lipid disorder                                        |                           |                                       |
|      | T99           | <i>Endocrine/metabolic/nutritional disease, other</i> | 001                       | <i>Acromegaly</i>                     |
|      |               | 006                                                   | <i>Amyloidosis</i>        |                                       |
|      |               | 028                                                   | <i>Cushings syndrome</i>  |                                       |
|      |               | 053                                                   | <i>Cystic fibrosis</i>    |                                       |
|      |               | 011                                                   | <i>Diabetes insipidus</i> |                                       |
|      |               | 002                                                   | <i>Disease;Addisons</i>   |                                       |

| CHAP     | ICPC-2 RUBRIC | DESCRIPTION                        | ICPC-2 PLUS CODE | DESCRIPTION                      |
|----------|---------------|------------------------------------|------------------|----------------------------------|
|          |               |                                    | 064              | <i>Disease;fibrocystic</i>       |
|          |               |                                    | 013              | <i>Disease;Gilberts</i>          |
|          |               |                                    | 018              | <i>Disease;Hashimotos</i>        |
|          |               |                                    | 046              | <i>Disease;Wilson's</i>          |
|          |               |                                    | 035              | <i>Haemochromatosis</i>          |
|          |               |                                    | 073              | <i>Homocystinuria</i>            |
|          |               |                                    | 036              | <i>Hyperaldosteronism</i>        |
|          |               |                                    | 037              | <i>Hyperparathyroidism</i>       |
|          |               |                                    | 069              | <i>Hyperprolactinaemia</i>       |
|          |               |                                    | 030              | <i>Hypoparathyroidism</i>        |
|          |               |                                    | 023              | <i>Phenylketonuria</i>           |
|          |               |                                    | 043              | <i>Polycystic ovary syndrome</i> |
|          |               |                                    | 026              | <i>Porphyria</i>                 |
|          |               |                                    | 040              | <i>Stein Leventhal syndrome</i>  |
|          |               |                                    | 041              | <i>Thyroiditis</i>               |
| <b>U</b> | U75           | Malignant neoplasm kidney          |                  |                                  |
|          | U76           | Malignant neoplasm bladder         |                  |                                  |
|          | U77           | Malignant neoplasm, urinary, other |                  |                                  |
|          | U88           | Glomerulonephritis/nephrosis       |                  |                                  |
|          | U99           | <i>Urinary disease, other</i>      | 019              | <i>Diverticulitis;bladder</i>    |
|          |               |                                    | 023              | <i>Failure;renal;chronic</i>     |
|          |               |                                    | 022              | <i>Insufficiency;renal</i>       |
|          |               |                                    | 006              | <i>Necrosis;renal</i>            |
|          |               |                                    | 024              | <i>Necrosis;renal;papillary</i>  |
|          |               |                                    | 013              | <i>Reflux;ureteric</i>           |
|          |               |                                    | 028              | <i>Stenosis;artery;renal</i>     |

| CHAP     | ICPC-2 RUBRIC | DESCRIPTION                             | ICPC-2 PLUS CODE | DESCRIPTION              |
|----------|---------------|-----------------------------------------|------------------|--------------------------|
|          |               |                                         | <i>017</i>       | <i>Stenosis;urethral</i> |
| <b>W</b> | W15           | Infertility/subfertility                |                  |                          |
|          | W72           | Malignant neoplasm related to fertility |                  |                          |
| <b>X</b> | X74           | Pelvic inflammatory disease             |                  |                          |
|          | X75           | Malignant neoplasm cervix               |                  |                          |
|          | X76           | Malignant neoplasm breast female        |                  |                          |
|          | X77           | Malignant neoplasm genital female other |                  |                          |
|          | X99           | <i>Genital disease, other</i>           | <i>016</i>       | <i>Endometriosis</i>     |
|          |               |                                         | <i>009</i>       | <i>Fistula;vaginal</i>   |
| <b>Y</b> | Y77           | Malignant neoplasm prostate             |                  |                          |
|          | Y78           | Malignant neoplasm male genital, other  |                  |                          |
|          | Y85           | Benign prostatic hypertrophy            |                  |                          |

N.B. Italics indicate that the ICPC-2 rubric is chronic only at the ICPC-2 PLUS level. Conditions listed in the 'ICPC-2 PLUS Code' column are those within the rubric which have been labelled as chronic using the extended terminology of ICPC-2 PLUS.

Source: O'Halloran J, Miller GC, Britt H. Defining chronic conditions for primary care with ICPC-2. Family Practice [Internet]. 2004 Aug 1;21(4):381–6.
