# Supplementary material for: Implementation of a virtual community of practice to promote the empowerment of middle-aged people with multimorbidity: study protocol of a randomised controlled trial
Source: PubMed Central journal article supplement — BMJ Open. 2024 May 24;14(5):e084937. doi: 10.1136/bmjopen-2024-084937 (PMC11129026; doi:10.1136/bmjopen-2024-084937), 2024-05-24
Supplement: bmjopen-2024-084937supp005.pdf [file bmjopen-2024-084937supp005.pdf]

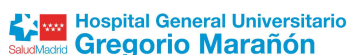**DICTAMEN DEL COMITÉ de ÉTICA DE LA INVESTIGACIÓN con MEDICAMENTOS**

D. Roberto Collado Borrell, Secretario Técnico del **COMITÉ de ÉTICA DE LA INVESTIGACIÓN con MEDICAMENTOS HOSPITAL GENERAL UNIVERSITARIO GREGORIO MARAÑÓN**

**CERTIFICA**

Que se ha evaluado la propuesta del promotor referida al estudio observacional:

**Código** PI22/01124

**TÍTULO:** "Efectividad y coste-efectividad de una Comunidad de Práctica virtual (CdPV aplicación web) para la mejora del empoderamiento de personas de mediana edad con multimorbilidad: ECA"

**Protocolo** versión 2. 29 de mayo de 2023. **Hoja de Información al paciente y Consentimiento Informado Fase Ensayo Clínico** versión 3. 7 de junio de 2023. **Hoja de Información al paciente y Consentimiento Informado Fase Co-Diseño** versión 1. 20 de marzo de 2023.

**Promotor:** Investigador

- El estudio se plantea siguiendo los requisitos legalmente establecidos, y su realización es pertinente.
- Se cumplen los requisitos necesarios de idoneidad del protocolo en relación con los objetivos del estudio y están justificados los riesgos y molestias previsibles para el sujeto.
- Es adecuado el procedimiento para obtener el consentimiento informado
- El alcance de las compensaciones económicas previstas no interfiere con el respeto a los postulados éticos.
- La capacidad del investigador y sus colaboradores, y las instalaciones y medios disponibles, tal y como ha sido informado, son apropiados para llevar a cabo el estudio.

Este CEIm actuando como comité evaluador, emite **dictamen favorable** y acepta que dicho estudio sea realizado en los centros siguientes por los investigadores principales que se relacionan a continuación:

Dra. Ana Isabel González González / Unidad de Innovación y Proyectos Internacionales - Consejería de Sanidad de la Comunidad de Madrid

**Y HACE CONSTAR QUE:**

1º En la reunión celebrada el día **05 de junio de 2023, acta 11/2023** se decidió emitir el informe correspondiente al estudio de referencia.

2º En dicha reunión se cumplieron los requisitos establecidos en la legislación vigente -Real Decreto 1090/2015 y Decreto 39/94 de la Comunidad de Madrid- para que la decisión del citado CEIm sea válida.

3º El CEIm, tanto en su composición, como en los PNT cumple con las normas de BPC (CPMP/ ICH/ 135/95)

4º La composición actual del CEIm es la siguiente:

- D. ANDRÉS JESÚS MUÑOZ MARTÍN (Oncología Médica - Presidente)
- Dª. MARÍA LUISA NAVARRO GÓMEZ (Pediatría - Vicepresidenta)
- D. ROBERTO COLLADO BORRELL (Farmacia Hospitalaria – Secretario Técnico)
- D. JUAN ANTONIO ANDUEZA LILLO (Medicina Interna)
- Dª. BEATRIZ AUDIBERT AMOROTO (Licenciada en Derecho)
- Dª. MARÍA LUISA BAEZA OCHOA DE OCÁRIZ (Alergología)
- Dª. PILAR AITANA CALVO FERRÁNDIZ (Farmacología Clínica)
- Dª. ISABEL CASTREJÓN FERNÁNDEZ (Reumatología)
- Dª MARÍA DEL CARMEN DE LA CRUZ ARGUEDAS (Unidad de Apoyo a la Investigación)
- D. VICENTE DE LAS PEÑAS GIL (Psicología Clínica)
- D. JAVIER DE MIGUEL DÍEZ (Neumología)
- Dª. PATRICIA FONT LÓPEZ (Hematología y Hemoterapia)
- Dª. ISABEL GÓMEZ VALBUENA (Farmacia de Atención Primaria)
- D. PABLO GONZÁLEZ NAVARRO (Bioestadística)
- Dª. MARÍA DEL CARMEN HERAS ESCOBAR (Enfermería)
- Dª. LUIS IBÁÑEZ SAMANIEGO (Digestivo)
- Dª. ANA MARÍA IGLESIAS MOHEDANO (Neurología)
- D. LUIS ANDRÉS LÓPEZ FERNÁNDEZ (Biología)
- Dª. ANA ESTHER LÓPEZ PÉREZ (Anestesiología y Reanimación)
- D. ANTONIO MUIÑO MIGUEZ (Medicina Interna)
- Dª. SARA PÉREZ RAMÍREZ (Oncología)
- D. JOSÉ LUIS REVUELTA HERRERO (Farmacia Hospitalaria)
- D. EDUARDO ZATARAÍN NICOLÁS (Cardiología)

Lo que firmo en Madrid, a 07 de junio de 2023

COLLADO

BORRELL

ROBERTO

C/ Dr. Esquerdo 46, Pabellón de Gobierno, Pecho 20, 28007 Madrid  
ceim.hguqm@salud.madrid.org Tlf. 91 585 2074/91 426 9378

Firmado digitalmente  
por COLLADO BORRELL  
ROBERTO  
Fecha: 2023.06.07 14:59:17
